# Supplementary material for: Size-tunable NaGdF4 nanoparticles as T2 contrast agents for high-field magnetic resonance imaging
Source: Royal Society of Chemistry journal article supplement (doi:10.1039/c7ra08303c), 2017-01-01
Supplement: c7ra08303c1.pdf [file c7ra08303c1.pdf]

# Size-tunable NaGdF<sub>4</sub> nanoparticles as T<sub>2</sub> contrast agents for high-field magnetic resonance imaging

Zhigao Lu,<sup>†,‡</sup> Ruijun Deng,<sup>†,‡</sup> Mingming Zhen,<sup>†,‡,\*</sup> Xue Li,<sup>†,‡</sup> Toujun Zou,<sup>†</sup> Yue  
Zhou,<sup>†,‡</sup> Mirong Guan,<sup>†</sup> Ying Zhang,<sup>†,‡</sup> Yuqing Wang,<sup>§</sup> Tong Yu,<sup>†,‡</sup> Chunying Shu,<sup>†,‡</sup>  
and Chunru Wang,<sup>†,‡,\*</sup>

<sup>†</sup>Beijing National Laboratory for Molecular Sciences, Laboratory of Molecular Nanostructure and Nanotechnology, CAS Research/Education Center for Excellence in Molecular Sciences, Institute of Chemistry, Chinese Academy of Sciences, Beijing 100190, China.

<sup>‡</sup>University of Chinese Academy of Sciences, Beijing 100049, China.

<sup>§</sup>CAS key laboratory for Biomedical Effects of Nanomaterials and Nanosafety, National center for nanoscience and Technology of china, NO.11 Zhongguanyuan Beiyitiao, Beijing, 100190, china.

E-mail: crwang@iccas.ac.cn, zhenmm@iccas.ac.cn, Tel: 86-10-62652120;

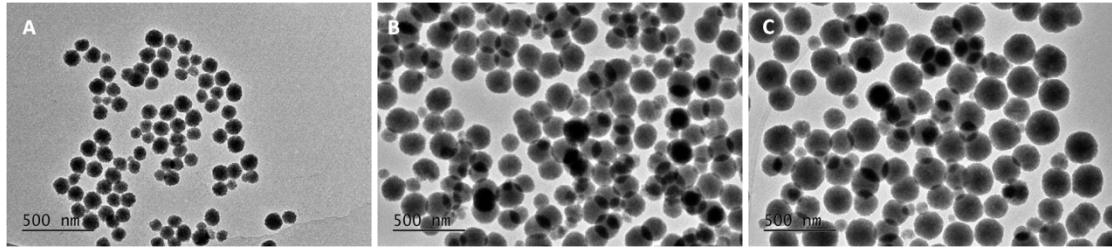

Figure S1. TEM images of NaGdF<sub>4</sub> NPs, samples 1 ( A ) , samples 2 ( B ) , and samples 3 ( C ) .

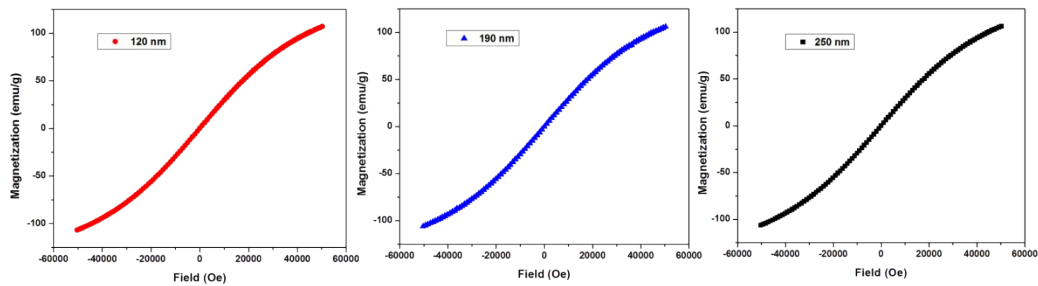

Figure S2 Mass magnetization of different size of NaGdF<sub>4</sub>@SiO<sub>2</sub> NPs obtained using a SQUID magnetometer. red line: 120 nm, blue line 190 nm, black line 250 nm

| Particle size (nm) | $r_1/[Gd^{3+}](mM^{-1}S^{-1})$ |       | $r_2/[Gd^{3+}](mM^{-1}S^{-1})$ |       | $r_2/r_1$ |       |
|--------------------|--------------------------------|-------|--------------------------------|-------|-----------|-------|
|                    | 0.5 T                          | 7 T   | 0.5 T                          | 7 T   | 0.5 T     | 7 T   |
| 120                | 1.422                          | 0.746 | 4.359                          | 129.7 | 3.06      | 173.8 |
| 190                | 0.548                          | 0.471 | 5.754                          | 142.9 | 10.5      | 303.4 |
| 250                | 0.393                          | 0.272 | 8.553                          | 159.6 | 21.76     | 586.8 |

Table S1.  $r_1$  and  $r_2$  relaxivity and  $r_2/r_1$  values of NaGdF<sub>4</sub>@SiO<sub>2</sub> using 0.5 T and 7 T MRI scanner.

| Particle size (nm) | 0.5 T                                                  |                                                  |                                                 |           | 7 T                                                    |                                                  |                                                 |           |
|--------------------|--------------------------------------------------------|--------------------------------------------------|-------------------------------------------------|-----------|--------------------------------------------------------|--------------------------------------------------|-------------------------------------------------|-----------|
|                    | $r_2/[Gd^{3+}]$<br>(mM <sup>-1</sup> S <sup>-1</sup> ) | $r_2/M$<br>(mg/ml) <sup>-1</sup> S <sup>-1</sup> | $r_2/NP$<br>(mM <sup>-1</sup> S <sup>-1</sup> ) | $r_2/r_1$ | $r_2/[Gd^{3+}]$<br>(mM <sup>-1</sup> S <sup>-1</sup> ) | $r_2/M$<br>(mg/ml) <sup>-1</sup> S <sup>-1</sup> | $r_2/NP$<br>(mM <sup>-1</sup> S <sup>-1</sup> ) | $r_2/r_1$ |
| 120                | 4.359                                                  | 17                                               | $5.2 \times 10^7$                               | 3.06      | 129.7                                                  | 512                                              | $1.56 \times 10^9$                              | 173.8     |
| 190                | 5.754                                                  | 22                                               | $2.7 \times 10^8$                               | 10.5      | 142.9                                                  | 558                                              | $6.81 \times 10^9$                              | 303.4     |
| 250                | 8.553                                                  | 33                                               | $9.3 \times 10^8$                               | 21.76     | 159.6                                                  | 623                                              | $1.73 \times 10^{10}$                           | 586.8     |

Table S2.  $r_2$  relaxivity,  $r_2/M$ ,  $r_2/NP$  and  $r_2/r_1$  values of NaGdF<sub>4</sub>@SiO<sub>2</sub> using 0.5 T and 7 T MRI scanner.

## Relaxivity Calculation<sup>1</sup>

The concentration of Gd<sup>3+</sup> ions determined by ICP-MS in the stock solution was used to calculate the molecular mass of NaGdF<sub>4</sub> in the specimen using the ratio

$$m(\text{Gd})/m(\text{NaGdF}_4) = 0.6137$$

This was used to calculate the  $r_1/M$  (mass relaxivity) values

The NaGdF<sub>4</sub> NPs synthesized have Hexagonal closed pack (HCP)-crystal structure and the density of HCP NaGdF<sub>4</sub> 5.65g/cc was used to determine the mass of a NP, considering that the NPs are perfect spheres and their volume determined using

$$V = 4/3\pi R^3 \text{ (where R is the radius of the NP)}$$

Comparing the mass of single NP and the total mass determined from ICP-MS the total number of NPs (N) in the stock solution was determined and used to calculate the  $r_2/\text{NP}$  (Nanoparticle relaxivity)

1. N. J. J. Johnson, W. Oakden, G. J. Stanis, R. Scott Prosser and F. C. J. M. van Veggel, *Chem. Mater.*, 2011, **23**, 3714-3722.
